# Supplementary material for: Allergen-encoding bone marrow transfer inactivates allergic T cell responses, alleviating airway inflammation
Source: JCI journal article supplement (doi:10.1172/jci.insight.85742), 2017-06-01
Supplement: sd1 [file 1]

**Fig 1 - 3**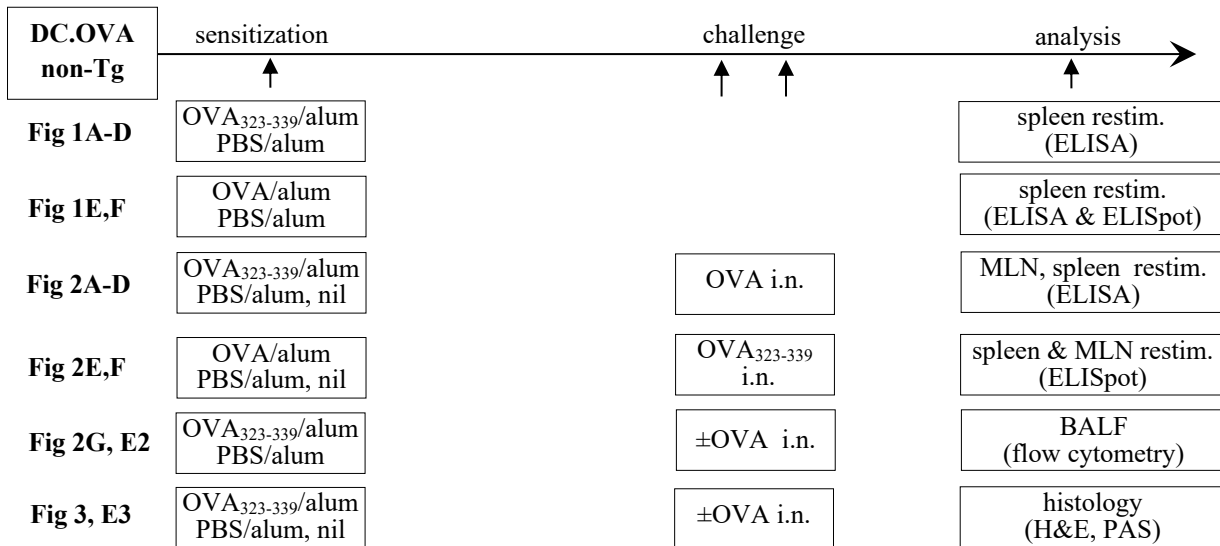**Fig 4**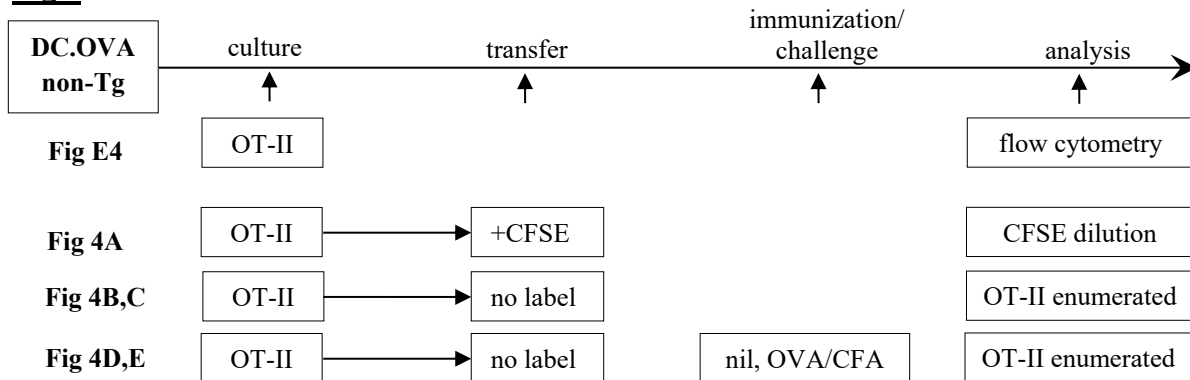**Fig 5 - 8**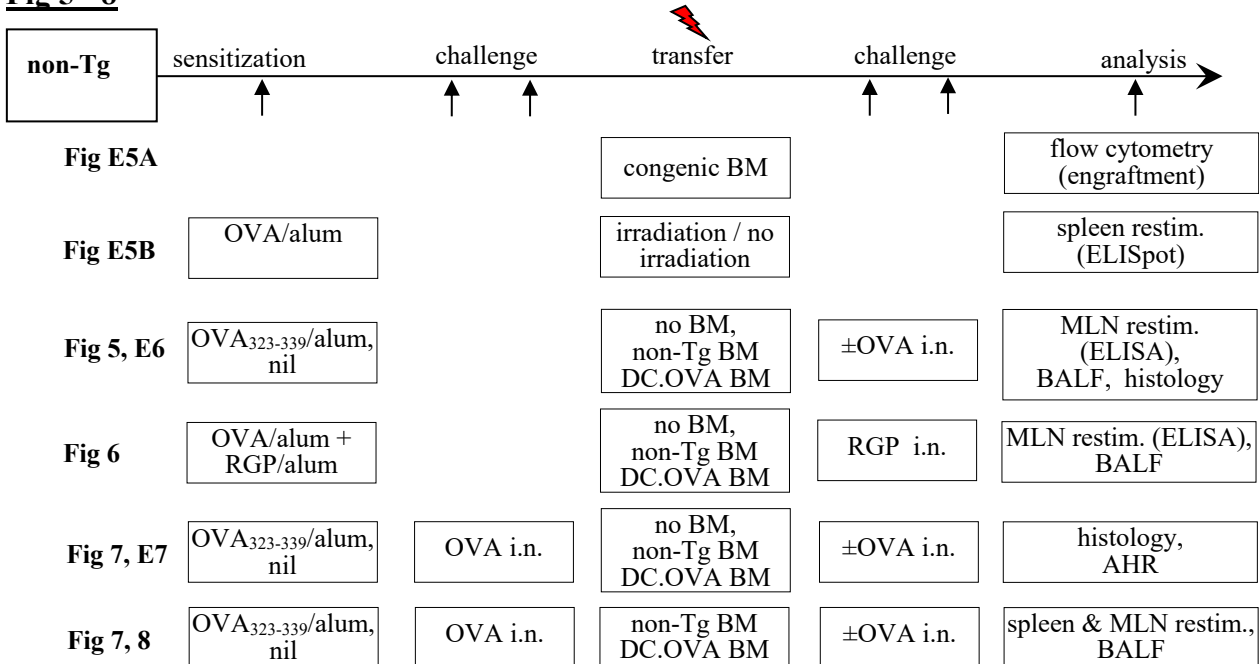**Supplemental Figure 1. Overview of experimental layouts.**

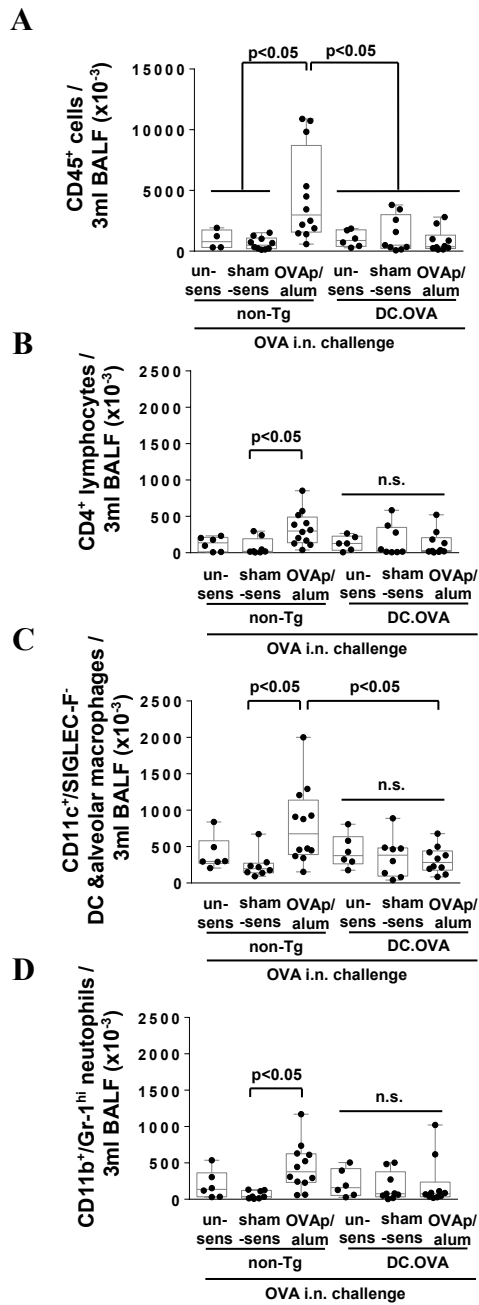

**Supplemental Figure 2. Expression of allergen in DC prevents airways inflammation. A-D)** DC.OVA or non-transgenic littermates (non-Tg) were sensitized with OVA<sub>323-339</sub>/alum (day 0,14), sham-sensitized with PBS/alum (sham-sens.) or left unsensitized (unsens.) and i.n. challenged with OVA (11,12,13,14 and 19,20,21,22 days post-sensitization). One day after the last i.n. challenge mice were euthanized, BALF collected and analysed by flow cytometry. Data are pooled from 2 experiments with box and whisker plots showing individual values, median, quartiles and range. ANOVA, Neuman-Keuls post-test.

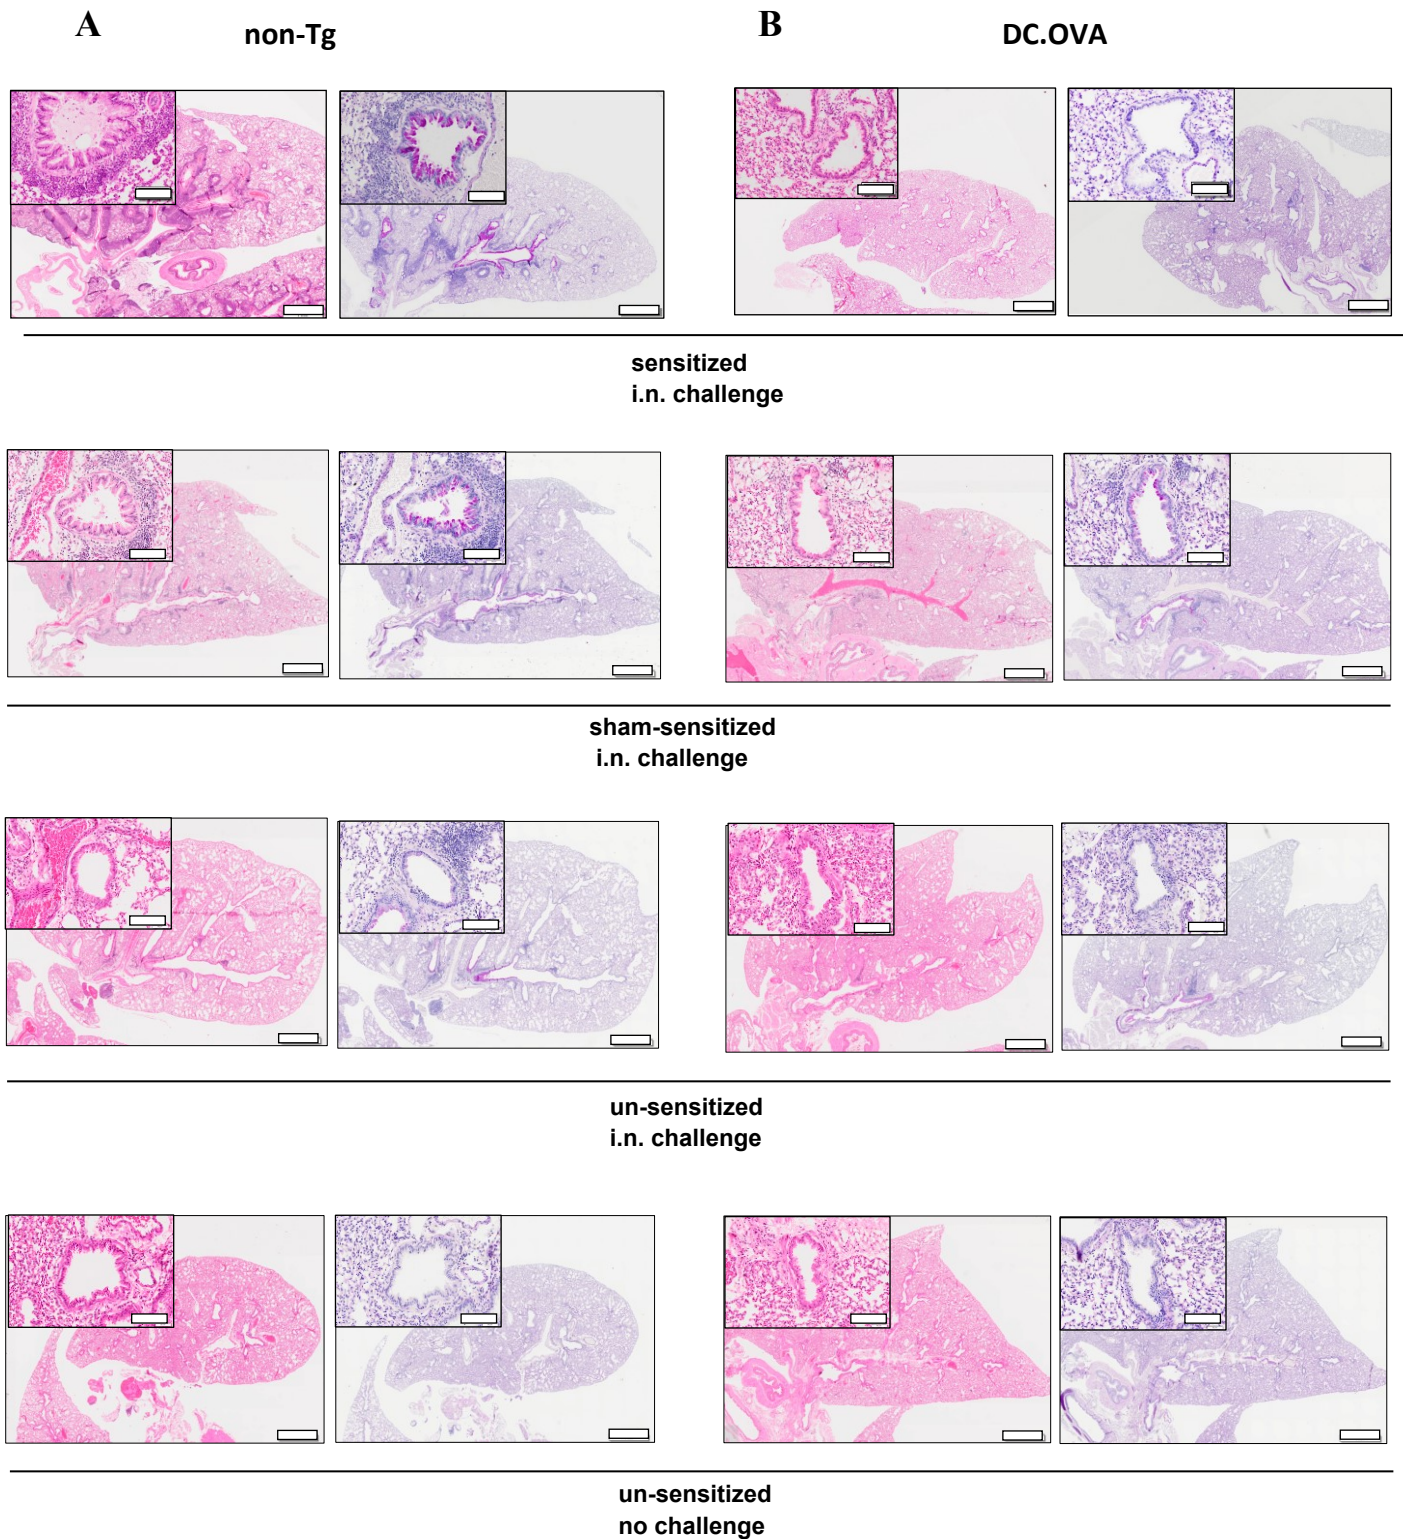

**Supplemental Figure 3. Expression of allergen in DC prevents pathology.** DC.OVA or non-transgenic littermates (non-Tg) were sensitized with OVA<sub>323-339</sub>/alum (day 0,14), sham-sensitized with PBS/alum(sham-sensitized) or left unsensitized (un-sensitized) and i.n. challenged with OVA (11,12,13,14 and 19,20,21,22 days post-sensitization) as indicated. One day after the last i.n. challenge mice were euthanized, BALF collected and lungs fixed for analysis. Untreated BALB/c mice (un-sensitized, no challenge) were included for comparison. Sections were stained with hematoxylin and eosin or periodic acid-Schiff's stain and images collected. Images shown are representative of 4 (un-sens) or 6 (all other groups) mice per group pooled from 2 experiments. Scale bar denotes 1mm in low power micrographs and 100 $\mu$ m in high-power insets.

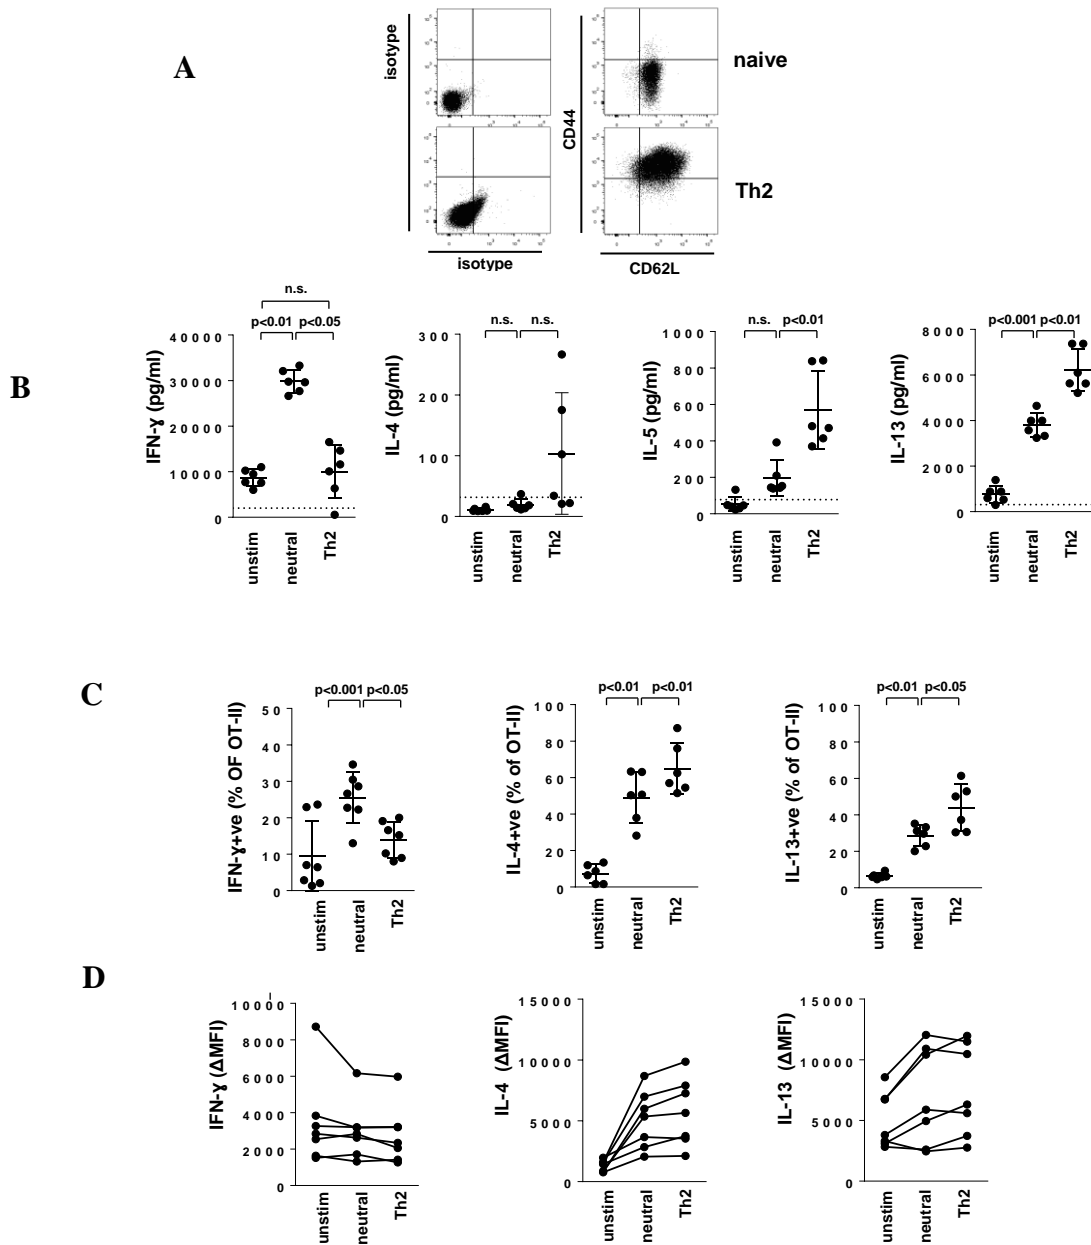

**Supplemental Figure 4. Characterisation of Th2-skewed OVA-specific T cells.** Spleen and lymph node cells from CD45.1<sup>+</sup> or CD45.2<sup>+</sup> OT-II mice were cultured under neutral or Th2-skewing conditions. **A**) Naive (upper panels) and Th2-skewed cells (lower panels) were compared by flow cytometry. **B-E**) OT-II T cells initially cultured IL-2/no OVA<sub>323-339</sub> (unstim) or in neutral or Th2-skewing conditions were either (**B**) restimulated for 3 days with OVA<sub>323-339</sub> and then cytokines in culture supernatant determined by ELISA or (**C,D**) stimulated with PMA/ionomycin and intracellular cytokine staining and cytometry performed. Data are representative of 2 mice per group from 2 experiments (A) or 5-6 mice per group pooled from 3-4 experiments (C) or individual mice pooled from three experiments (D). Bars where shown depict mean  $\pm$  SD. ANOVA and Tukey's multiple comparison test (B,D).

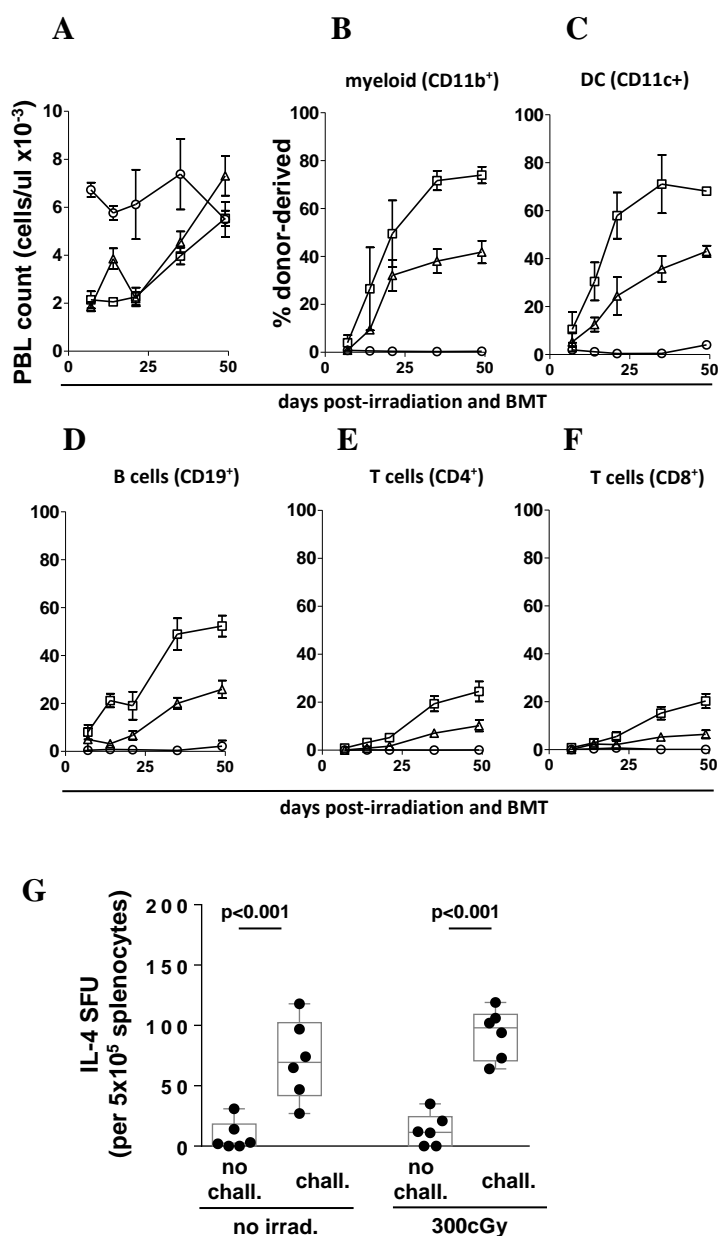

### Supplemental Figure 5. Low-dose irradiation facilitates engraftment whilst preserving immunity.

**A-F**) BALB/c mice were irradiated (300cGy) and BM ( $2 \times 10^7$ , open squares) or  $\text{lin}^{-\text{ve}}$  c-kit $^{+\text{ve}}$  HPC ( $10^5$ , open triangles) from CD45.1 $^{+}$  BALB/c mice injected i.v. At the indicated times blood was collected from transplanted mice and unirradiated untransplanted controls (open circles) and engraftment determined by flow cytometry. **G**) BALB/c mice were sensitized (OVA/alum i.p.) and 14 days later irradiated (300cGy). 28 days after irradiation mice were challenged or not with a second i.p. OVA/alum sensitization and a further week later euthanized and spleens collected. Cells producing IL-4 in response to OVA<sub>323-339</sub> were enumerated by ELISpot. Data shown are mean  $\pm$  SD (n= 4/gp) pooled from 2 separate experiments (A-F) or individual mice pooled from 2 experiments with median, quartiles and range shown (G).

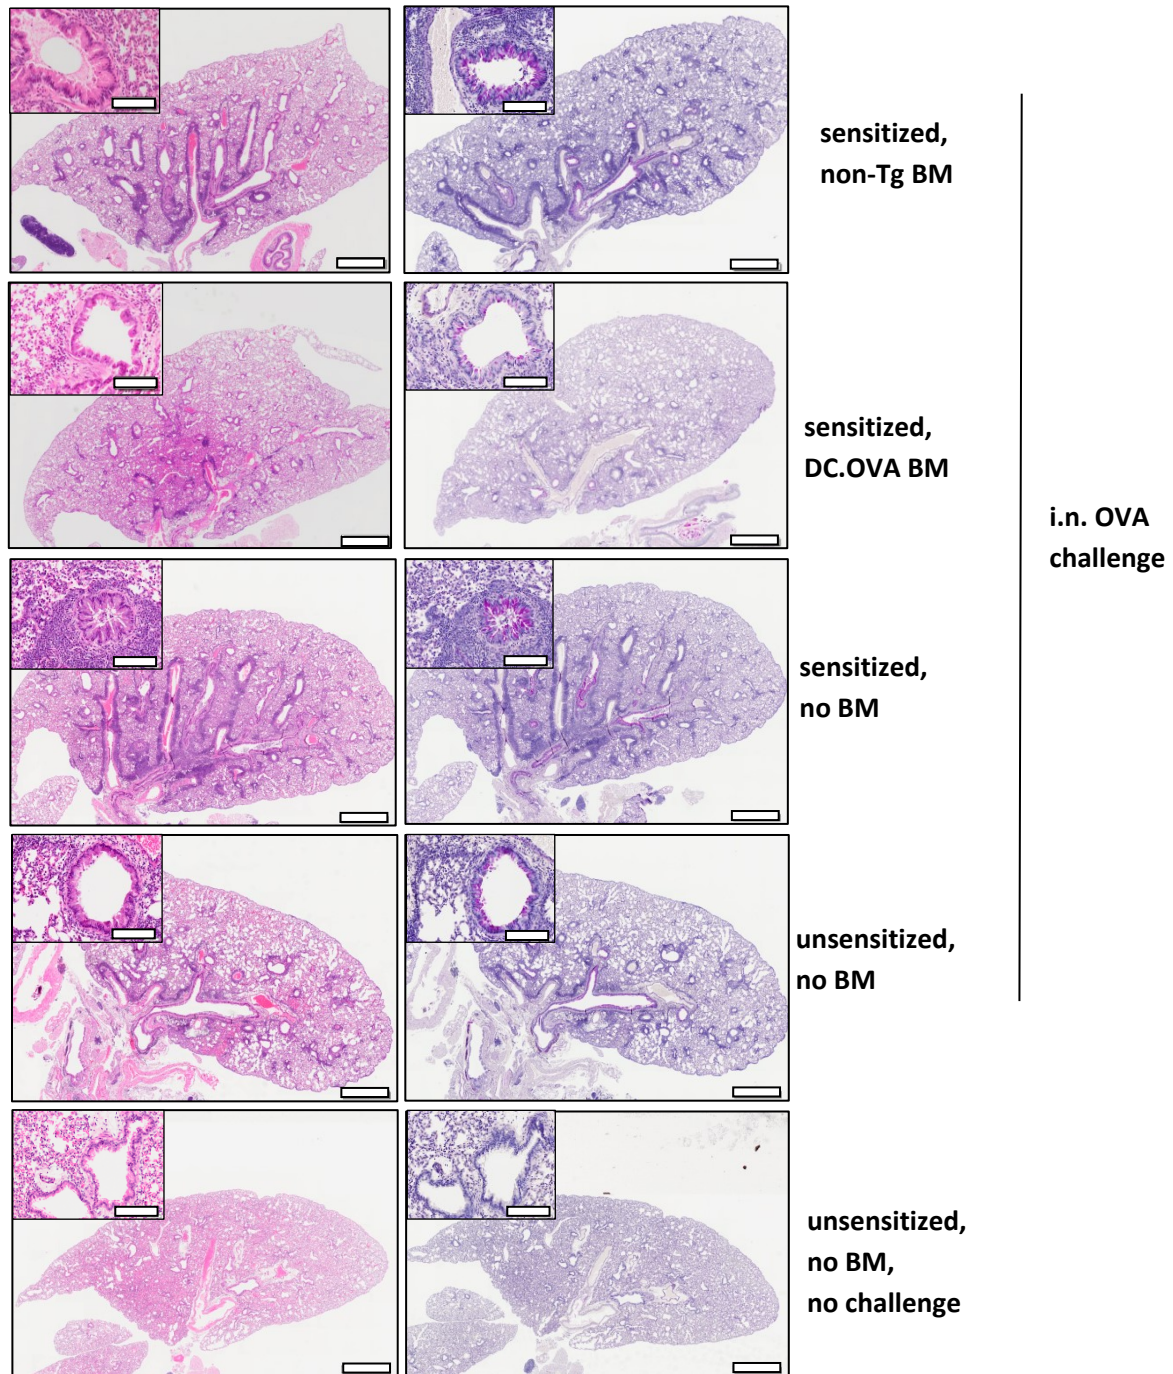

**Supplemental Figure 6. BM transfer terminates Th2 responses and prevents allergen-elicited airways inflammation.** BALB/c mice were sensitized with OVA<sub>323-339</sub>/alum (day 0,14) or not and some mice irradiated (300cGy) and injected with BM from DC.OVA (OVA<sup>+</sup> BMT) or non-Tg (OVA<sup>-</sup> BMT) donors. 4 weeks later mice were i.n. challenged with OVA daily (28,29,30,31 and 37,38,39,40 days after BMT). One day after the last i.n. challenge mice were euthanized. BALF collected and lungs fixed for analysis. Untreated BALB/c mice (unsens, no BM, no challenge) were included for comparison. Sections were stained with H&E or PAS and images collected. Images are representative of 6 mice/group pooled from 2 experiments. Scale bar denotes 1mm in low power micrographs and 100µm in high-power insets.

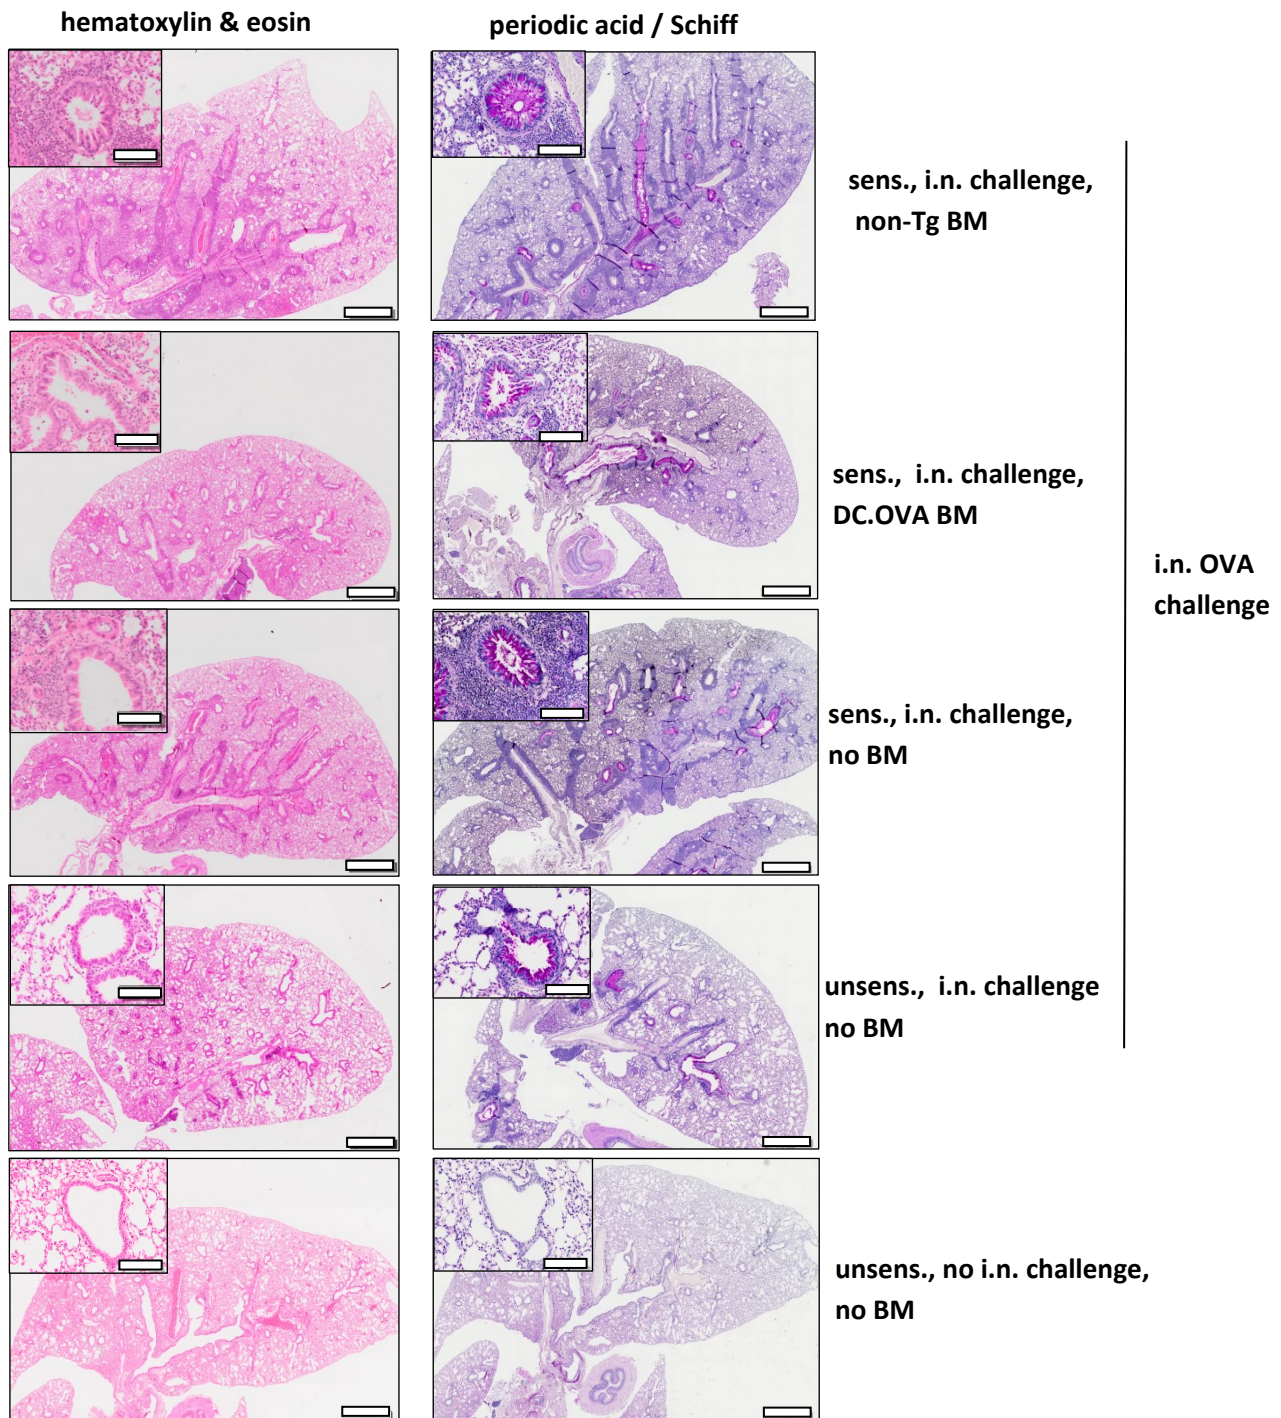

**Supplemental Figure 7. Transfer of OVA-encoding BM ameliorates established airways inflammation.** BALB/c mice were sensitised with OVA<sub>323-339</sub>/alum (day 0,14) or not and challenged with OVA i.n. daily (11,12,13,14 and 20,21,22,23 days after sensitisation). Some mice were irradiated (300cGy) and injected with BM from DC.OVA (DC.OVA BM) or non-Tg (non-Tg BM) donors. 4 weeks later mice were i.n. challenged with OVA daily (28,29,30,31 and 37,38,39,40 days after BMT). One day after the last i.n. challenge mice were euthanized, BALF collected and lungs fixed for analysis. Untreated BALB/c mice (unsens., no i.n. challenge, no BMT) were included for comparison. Sections were stained with H&E or PAS and images. Scale bar denotes 1mm in low power micrographs and 100µm in high-power insets.

| Antigen                | Conjugation  | Clone    | Supplier / #          |
|------------------------|--------------|----------|-----------------------|
| CD4                    | PE           | GK1.5    | BioLegend 100408      |
| CD4                    | FITC         | GK1.5    | BioLegend 100306      |
| CD4                    | PE-Cy7       | GK1.5    | BioLegend 100422      |
| CD4                    | biotin       | GK1.5    | In house              |
| CD8 $\alpha$           | PerCP.Cy5.5  | 53-6.7   | BioLegend 100734      |
| CD8 $\alpha$           | biotin       | YTS-169  | in house              |
| CD11b                  | PerCP.Cy5.5  | M1/70    | BioLegend 101228      |
| CD11c                  | FITC         | N418     | BioLegend 117306      |
| CD11c                  | APC          | N418     | BioLegend 117310      |
| CD44                   | FITC         | IM7      | BioLegend 100366      |
| CD45.1                 | PE           | A20      | BioLegend 110708      |
| CD45.1                 | APC          | A20      | BioLegend 110714      |
| CD45.2                 | PE.Cy7       | 104      | BioLegend 109830      |
| CD45.2                 | AF700        | 104      | BioLegend             |
| CD45.2                 | APC          | 104      | BioLegend 109814      |
| CD45R                  | FITC         | B220     | BioLegend 103206      |
| CD62L                  | APC          | MEL-14   | BioLegend 104412      |
| CD279                  | BV605        | 29F.1A12 | BioLegend135219       |
| LAG-3                  | BV786        | C9B7W    | BioLegend 125129      |
| CD244                  | FITC         | m2B4     | BioLegend 133504      |
| Ly-6G/C<br>(Gr-1)      | FITC         | RB6-8C5  | in-house              |
| Ly-6C/G<br>Gr-1        | biotin       | RB6-8C5  | in-house              |
| Siglec-F               | PE           | E50-2440 | Pharmlingen 552126    |
| TCR                    | Pacific Blue | H57-597  | BioLegend 109226      |
| TCR V $\alpha$ 2       | PE           | B20.1    | BioLegend 127808      |
| TCR V $\beta$ 5.1/5.2  | FITC         | MR9-4    | BD 553189             |
| IFN- $\gamma$ (I.C.C.) | APC          | XMG1.2   | BioLegend 505810      |
| IFN- $\gamma$ (I.C.C.) | PerCP.Cy5.5  | XMG1.2   | BioLegend 505808      |
| IL-4 (I.C.C)           | PE           | 11B11    | BioLegend 504104      |
| IL-13 (I.C.C.)         | PE-Cy7       | eBio13A  | eBioscience 25-713-80 |
| IFN- $\gamma$ (ELISA)  | unconj       | R4-6A2   | BioLegend 505706      |
| IL-4 (ELISA/ELISpot)   | unconj       | 1B11     | BioLegend 504108      |
| IL-5 (ELISA)           | unconj       | TRFK5    | Biolegend 504302      |
| IL-13 (ELISA)          | unconj       | 13A      | eBioscience 14-7133   |



|                       |        |           |                     |
|-----------------------|--------|-----------|---------------------|
| IFN- $\gamma$ (ELISA) | biotin | XMG1.2    | BioLegend 505804    |
| IL-4 (ELISA/ELISpot)  | biotin | BVD6-24G2 | BioLegend 504202    |
| IL-5 (ELISA)          | biotin | TRFK4     | BioLegend 504402    |
| IL-13 (ELISA)         | biotin | 1316H     | eBioscience 13-7135 |

**Supplemental Table 1. Antibodies used for flow cytometry, ELISA and ELISpot.**
